# Supplementary material
Source: MDPI journal article supplement (https://www.mdpi.com/2071-1050/14/13/8024)
Supplement: s1 [file s1]

# Metal contents and pollution indices assessment of surface water, soil and sediment from the Aries River basin mining area, Romania

Ana Moldovan<sup>1,2</sup>, Anamaria Iulia Török<sup>\*1</sup>, Eniko Kovacs<sup>1,3\*</sup>, Oana Cadar<sup>1</sup>, Ionuț Cornel Mirea<sup>4</sup>, Valer Micle<sup>2</sup>

<sup>1</sup> INCDO-INOE 2000, Research Institute for Analytical Instrumentation, 67 Donath Street, 400293 Cluj-Napoca, Romania; ana.moldovan@icia.ro (A.M.); iulia.torok@icia.ro (A.I.T.); oana.cadar@icia.ro (O.C.)

<sup>2</sup> Faculty of Materials and Environmental Engineering, Technical University, 103-105 Muncii Boulevard, 400641 Cluj-Napoca, Romania; valer.micle@imadd.utcluj.ro

<sup>3</sup> Faculty of Horticulture, University of Agricultural Sciences and Veterinary Medicine, 3–5 Manastur Street, 400372 Cluj-Napoca, Romania; eniko.kovacs@icia.ro

<sup>4</sup> Department of Geology and Paleontology, Emil Racovitza Institute of Speleology, Calea 13 Septembrie, 050711 Bucharest, Romania; [ionut.cornel.mirea@gmail.com](mailto:ionut.cornel.mirea@gmail.com)

\* Correspondence: iulia.torok@icia.ro (A.I.T.); eniko.kovacs@icia.ro (E.K.)

This online resource contains the following data:

1. Sampling location associated with the sampled matrices.
2. The total metal and metalloid element content (mg/L) of the surface water samples from the sampling stations (1-23), highlighted with different colors (Excel, Conditional Formatting tool) in order to show the highest, medium and lowest concentration variation in each metal column (from highest, red-orange-yellow-green, to lowest values) between the sampling locations.
3. The total metal and metalloid element content (mg/kg DW) of the soil samples from the sampling stations (1-23), highlighted with different colors (Excel, Conditional Formatting tool) in order to show the highest, medium and lowest concentration variation in each metal column (from highest, red-orange-yellow-green, to lowest values) between the sampling locations.
4. The total metal and metalloid element content (mg/kg DW) of the sediment samples from the sampling stations (1-23), highlighted with different colors (Excel, Conditional Formatting tool) in order to show the highest, medium and lowest concentration variation in each metal column (from highest, red-orange-yellow-green, to lowest values) between the sampling locations.
5. The pollution indices of the surface water sampled from the Arieș River basin.
6. Pollution and metal contamination assessing based on the indices values.
7. Comprehensive pollution indices of the analyzed metals in soil and sediment samples.

**Table S1.** Sampling locations associated with the sampled matrices.

|           | <b>Sampling site (location)</b>                 | <b>Surface water<br/>sampling code</b> | <b>Soil sample<br/>code</b> | <b>Sediment<br/>sample code</b> |
|-----------|-------------------------------------------------|----------------------------------------|-----------------------------|---------------------------------|
| <b>1</b>  | Arieşul Mare River, upstream Albac village      | A1                                     | S1                          | Sed1                            |
| <b>2</b>  | Arieşul Mare River, downstream Albac village    | A2                                     | S2                          | Sed2                            |
| <b>3</b>  | Arieşul Mic River, Dos village                  | A3                                     | S3                          | Sed3                            |
| <b>4</b>  | Arieş River, upstream Câmpeni village           | A4                                     | -                           | -                               |
| <b>5</b>  | Roşia Rivulet, Roşia Montană village            | A5                                     | -                           | -                               |
| <b>6</b>  | Roşia Rivulet, downstream Roşia Montană village | A6                                     | S6                          | Sed6                            |
| <b>7</b>  | Abrud River, upstream Cărpeneş village          | A7                                     | S7                          | Sed7                            |
| <b>8</b>  | Abrud River, downstream Cărpeneş village        | A8                                     | S8                          | Sed8                            |
| <b>9</b>  | Arieş River, downstream Bistra village          | A9                                     | S9                          | Sed9                            |
| <b>10</b> | Garda Rivulet, Lazuri village                   | A10                                    | -                           | -                               |
| <b>11</b> | Şesii Valley, dam                               | A11                                    | S11                         | Sed11                           |
| <b>12</b> | Şesii Valley, basin                             | A12                                    | -                           | -                               |
| <b>13</b> | Arieş River, downstream Lupşa village           | A13                                    | -                           | -                               |
| <b>14</b> | Arieş River, downstream Baia de Arieş town      | A14                                    | S14                         | Sed14                           |
| <b>15</b> | Arieş River, upstream Sălciuma de Jos village   | A15                                    | -                           | -                               |
| <b>16</b> | Arieş River, Poşaga de Jos village              | A16                                    | S16                         | Sed16                           |
| <b>17</b> | Arieş River, downstream Buru village            | A17                                    | S17                         | Sed17                           |
| <b>18</b> | Arieş River, Mihai Viteazu village              | A18                                    | S18                         | Sed18                           |
| <b>19</b> | Arieş River, Turda city                         | A19                                    | -                           | -                               |
| <b>20</b> | Arieş River, upstream Câmpia Turzii city        | A20                                    | S20                         | Sed20                           |
| <b>21</b> | Arieş River, downstream Câmpia Turzii city      | A21                                    | S21                         | Sed21                           |
| <b>22</b> | Arieş River, downstream Lunca village           | A22                                    | S22                         | Sed22                           |
| <b>23</b> | Arieş River, Gura Arieşului village             | A23                                    | S23                         | Sed23                           |

**Table S2.** The total metal and metalloid element content (mg/L) of the surface water samples from the sampling stations (1-23), highlighted with different colors (Excel, Conditional Formatting tool) in order to show the highest, medium and lowest concentration variation in each metal column (from highest, red-orange-yellow-green, to lowest values) between the sampling locations.

| Sampling station | <i>Fe</i>   | <i>Na</i> | <i>Mg</i> | <i>K</i> | <i>Ca</i> | <i>Ni</i> | <i>Cr</i> | <i>Cu</i> | <i>Zn</i> | <i>Cd</i> | <i>Pb</i> | <i>Mn</i> | <i>Al</i> | <i>As</i> | <i>Hg</i> |
|------------------|-------------|-----------|-----------|----------|-----------|-----------|-----------|-----------|-----------|-----------|-----------|-----------|-----------|-----------|-----------|
|                  | <i>mg/L</i> |           |           |          |           |           |           |           |           |           |           |           |           |           |           |
| A1               | <0.01       | 6.12      | 3.11      | 0.812    | 30.4      | 0.020     | <0.02     | 0.027     | <0.02     | <0.02     | 0.047     | <0.01     | 0.087     | 0.001     | <0.01     |
| A2               | 0.035       | 6.22      | 3.25      | 0.795    | 35.7      | 0.017     | <0.02     | 0.026     | <0.02     | <0.02     | 0.033     | <0.01     | 0.089     | 0.001     | <0.01     |
| A3               | 0.016       | 2.47      | 2.74      | 0.642    | 27.9      | 0.024     | <0.02     | 0.022     | 0.033     | <0.02     | 0.04      | <0.01     | 0.062     | 0.001     | <0.01     |
| A4               | 0.022       | 5.82      | 2.55      | 0.784    | 28.2      | 0.029     | <0.02     | 0.018     | <0.02     | <0.02     | 0.028     | <0.01     | 0.07      | 0.001     | <0.01     |
| A5               | 0.018       | 9.05      | 9.12      | 5.17     | 65.8      | 0.044     | <0.02     | 0.034     | 0.187     | <0.02     | 0.028     | 0.043     | 0.084     | 0.001     | <0.01     |
| A6               | 8.73        | 10.7      | 18.3      | 3.88     | 97.4      | 0.111     | <0.02     | 0.208     | 4.22      | 0.021     | 0.118     | 22.4      | 22.8      | 0.002     | <0.01     |
| A7               | 0.124       | 9.77      | 6.82      | 2.21     | 50.8      | 0.070     | <0.02     | 0.035     | 0.107     | <0.02     | <0.01     | 0.027     | 0.687     | 0.001     | <0.01     |
| A8               | 0.055       | 10.2      | 7.42      | 1.97     | 50.1      | 0.022     | <0.02     | 0.03      | 0.154     | <0.02     | 0.051     | 2.48      | 0.124     | 0.002     | <0.01     |
| A9               | 0.017       | 6.24      | 4.12      | 1.55     | 38.7      | 0.028     | <0.02     | 0.028     | 0.02      | <0.02     | 0.076     | 0.512     | 0.107     | 0.002     | <0.01     |
| A10              | 0.016       | 7.55      | 5.08      | 1.48     | 30.1      | <0.01     | <0.02     | 0.022     | <0.02     | <0.02     | <0.01     | <0.01     | 0.097     | 0.002     | <0.01     |
| A11              | 0.028       | 5.47      | 3.37      | 2.56     | 219       | <0.01     | <0.02     | 0.018     | <0.02     | <0.02     | <0.01     | 0.357     | 0.108     | 0.002     | <0.01     |
| A12              | 0.014       | 5.89      | 4.21      | 2.07     | 173       | 0.018     | <0.02     | 0.019     | 0.022     | <0.02     | <0.01     | 0.312     | 0.134     | 0.001     | <0.01     |
| A13              | 0.021       | 6.01      | 3.22      | 1.86     | 47.9      | <0.01     | <0.02     | 0.020     | <0.02     | <0.02     | <0.01     | 0.287     | 0.111     | 0.002     | <0.01     |
| A14              | 0.018       | 5.11      | 4.27      | 1.94     | 62.5      | 0.022     | <0.02     | 0.022     | <0.02     | <0.02     | <0.01     | 0.274     | 0.204     | 0.002     | <0.01     |
| A15              | 0.012       | 5.89      | 3.45      | 1.87     | 23.7      | 0.024     | <0.02     | 0.022     | <0.02     | <0.02     | 0.018     | 0.202     | 0.227     | 0.003     | <0.01     |
| A16              | 0.021       | 19.2      | 13.7      | 14.7     | 116       | 0.018     | <0.02     | 0.047     | 0.037     | <0.02     | 0.066     | 0.317     | 0.527     | 0.003     | <0.01     |
| A17              | 0.024       | 3.44      | 5.22      | 1.62     | 70.8      | 0.024     | <0.02     | 0.029     | <0.02     | <0.02     | 0.02      | <0.01     | 0.097     | 0.002     | <0.01     |
| A18              | 0.029       | 6.04      | 3.28      | 1.48     | 32.9      | <0.01     | <0.02     | 0.031     | 0.034     | <0.02     | <0.01     | 0.068     | 0.157     | 0.003     | <0.01     |
| A19              | 0.034       | 9.07      | 5.06      | 2.77     | 40.8      | 0.031     | <0.02     | 0.037     | 0.078     | <0.02     | 0.012     | 0.072     | 0.162     | 0.003     | <0.01     |
| A20              | 0.101       | 10.7      | 8.42      | 2.48     | 77.8      | 0.026     | <0.02     | 0.04      | 0.044     | <0.02     | 0.073     | 0.067     | 0.161     | 0.003     | <0.01     |
| A21              | 0.157       | 21.4      | 7.12      | 4.27     | 48.2      | 0.143     | <0.02     | 0.100     | 0.147     | 0.076     | 0.145     | 0.046     | 0.279     | 0.003     | <0.01     |
| A22              | 0.078       | 19.8      | 7.05      | 7.06     | 47.3      | 0.022     | <0.02     | 0.088     | 0.055     | 0.055     | 0.074     | 0.054     | 0.209     | 0.003     | <0.01     |
| A23              | 0.055       | 17.3      | 7.03      | 6.87     | 49.2      | <0.01     | <0.02     | 0.043     | 0.088     | <0.02     | 0.025     | 0.067     | 0.164     | 0.001     | <0.01     |

**Table S3.** The total metal and metalloid element content (mg/kg DW) of the soil samples from the sampling stations (1-23), highlighted with different colors (Excel, Conditional Formatting tool) in order to show the highest, medium and lowest concentration variation in each metal column (from highest, red-orange-yellow-green, to lowest values) between the sampling locations.

| Sampling station | Fe    | Ni   | Cr   | Cu   | Zn   | Cd    | Pb   | Na  | Mg   | K    | Ca    | Mn   | Al    | As    | Hg    |
|------------------|-------|------|------|------|------|-------|------|-----|------|------|-------|------|-------|-------|-------|
|                  | mg/kg |      |      |      |      |       |      |     |      |      |       |      |       |       |       |
| S1               | 529   | 23.5 | 34.1 | 22.4 | 134  | <0.10 | 43.5 | 6.9 | 967  | 205  | 7512  | 61.1 | 743   | 0.134 | 0.094 |
| S2               | 11362 | 42.6 | 64.4 | 47.6 | 130  | <0.10 | 29.4 | 205 | 2281 | 2504 | 2506  | 712  | 2062  | 0.374 | 0.075 |
| S3               | 10831 | 22.5 | 38.7 | 28.4 | 92.4 | <0.10 | 21.5 | 124 | 2243 | 1912 | 2482  | 424  | 12046 | 0.108 | 0.064 |
| S5               | 11065 | 82.4 | 60.7 | 512  | 612  | <0.10 | 308  | 578 | 2062 | 2714 | 9672  | 1136 | 19609 | 0.824 | 0.657 |
| S7               | 10246 | 31.4 | 23.4 | 163  | 148  | <0.10 | 46.3 | 248 | 2469 | 2563 | 5121  | 762  | 17882 | 0.072 | 0.14  |
| S8               | 10364 | 105  | 52.4 | 55.8 | 336  | <0.10 | 26.4 | 192 | 2415 | 2561 | 2540  | 946  | 17211 | 0.226 | 0.061 |
| S9               | 10003 | 52.7 | 16.5 | 69.4 | 167  | <0.10 | 37.1 | 113 | 2547 | 1613 | 7317  | 834  | 17513 | 0.217 | 0.138 |
| S13              | 10045 | 36.2 | 30.4 | 81.3 | 154  | <0.10 | 28.9 | 112 | 2082 | 1194 | 2316  | 694  | 10622 | 0.146 | 0.173 |
| S14              | 10200 | 59.8 | 41.5 | 261  | 435  | <0.10 | 58.4 | 248 | 2364 | 2367 | 4022  | 860  | 16340 | 0.233 | 0.051 |
| S16              | 10037 | 31.4 | 33.4 | 33.2 | 123  | <0.10 | 19.5 | 152 | 2469 | 1600 | 9014  | 565  | 12263 | 0.176 | 0.098 |
| S17              | 9245  | 36.2 | 28.3 | 64.7 | 141  | <0.10 | 27.6 | 130 | 2023 | 1684 | 8241  | 537  | 10354 | 0.204 | 0.071 |
| S18              | 9520  | 30.8 | 30.6 | 113  | 266  | <0.10 | 33.4 | 324 | 2067 | 1673 | 11622 | 912  | 11267 | 0.209 | 0.127 |
| S20              | 9066  | 33.6 | 38.2 | 166  | 382  | <0.10 | 159  | 262 | 2055 | 1731 | 10974 | 1166 | 11307 | 0.326 | 0.072 |
| S21              | 9165  | 38.5 | 35.5 | 221  | 360  | <0.10 | 91.4 | 309 | 2016 | 3164 | 11842 | 1228 | 19797 | 0.228 | 0.034 |
| S22              | 9264  | 31.2 | 31.1 | 114  | 202  | <0.10 | 40.6 | 341 | 2043 | 1942 | 10456 | 821  | 11752 | 0.206 | 0.405 |
| S23              | 10654 | 32.5 | 27.6 | 82.5 | 184  | <0.10 | 25.7 | 116 | 2052 | 1167 | 2341  | 806  | 10671 | 0.211 | 0.109 |

**Table S4.** The total metal and metalloid element content (mg/kg DW) of the sediment samples from the sampling stations (1-23), highlighted with different colors (Excel, Conditional Formatting tool) in order to show the highest, medium and lowest concentration variation in each metal column (from highest, red-orange-yellow-green, to lowest values) between the sampling locations.

| Sampling station | Fe    | Ni   | Cr   | Cu   | Zn   | Cd   | Pb   | Na   | Mg   | K    | Ca   | Mn  | Al   | As   | Hg    |
|------------------|-------|------|------|------|------|------|------|------|------|------|------|-----|------|------|-------|
|                  | mg/kg |      |      |      |      |      |      |      |      |      |      |     |      |      |       |
| Sed1             | 314   | 8.17 | 10.4 | 8.12 | 22.1 | 0.41 | 13.4 | 57.8 | 412  | 117  | 2013 | 106 | 4167 | 3.11 | 0.037 |
| Sed2             | 5712  | 14.5 | 20.8 | 34.1 | 30.6 | 0.03 | 7.14 | 101  | 1410 | 112  | 1406 | 211 | 7032 | 16.1 | 0.083 |
| Sed3             | 5610  | 13.2 | 17.3 | 26.8 | 76.5 | 0.03 | 5.22 | 82.4 | 1261 | 462  | 2614 | 214 | 6127 | 3.82 | 0.06  |
| Sed6             | 5982  | 41.6 | 25.5 | 62.7 | 154  | 1.87 | 92.6 | 132  | 1296 | 1512 | 4463 | 342 | 7168 | 40.7 | 0.912 |
| Sed7             | 5634  | 7.08 | 14   | 33.9 | 62.8 | 0.03 | 6.33 | 55.8 | 1174 | 902  | 1877 | 184 | 5167 | 8.62 | 0.211 |
| Sed8             | 5864  | 22.3 | 8.22 | 41.2 | 91.8 | 0.37 | 12.7 | 64.2 | 1067 | 1367 | 3942 | 243 | 5831 | 11.2 | 0.074 |
| Sed9             | 5431  | 20.3 | 18.6 | 72.4 | 64.7 | 0.03 | 15.8 | 113  | 1205 | 588  | 4172 | 362 | 6229 | 6.87 | 0.058 |
| Sed13            | 5312  | 16.1 | 11   | 67.2 | 63.1 | 0.03 | 9.08 | 162  | 1194 | 640  | 1367 | 404 | 5462 | 6.57 | 0.079 |
| Sed14            | 5604  | 30.4 | 23.8 | 118  | 112  | 0.03 | 29.3 | 124  | 1361 | 1687 | 2192 | 386 | 8022 | 7.58 | 0.387 |
| Sed16            | 5367  | 18.2 | 14.9 | 91.7 | 74   | 0.03 | 5.8  | 145  | 1243 | 1950 | 1741 | 295 | 7268 | 6.21 | 0.018 |
| Sed17            | 5179  | 16.7 | 10.5 | 46.3 | 48.3 | 0.03 | 12.3 | 126  | 1262 | 903  | 2405 | 313 | 7082 | 6.63 | 0.018 |
| Sed18            | 5089  | 10.8 | 9.75 | 65.7 | 72.4 | 0.03 | 10.8 | 201  | 1187 | 386  | 4613 | 327 | 5033 | 7.06 | 0.037 |
| Sed20            | 5304  | 12.1 | 16.8 | 114  | 141  | 2    | 55.1 | 207  | 1106 | 682  | 5796 | 417 | 6547 | 12.6 | 0.244 |
| Sed21            | 5511  | 21   | 20.3 | 127  | 117  | 1.47 | 28.6 | 198  | 1913 | 913  | 8308 | 512 | 7562 | 11.8 | 0.127 |
| Sed22            | 5419  | 16.5 | 22.6 | 15.8 | 15.6 | 0.41 | 10.8 | 50.7 | 1306 | 652  | 1712 | 224 | 5064 | 11.6 | 0.108 |
| Sed23            | 5317  | 7.1  | 8.76 | 7.22 | 17.6 | 0.67 | 9.42 | 48.3 | 1264 | 688  | 1852 | 106 | 3106 | 11.3 | 0.113 |

**Table S5.** The pollution indices of the surface water sampled from the Arieş River basin.

|     | Water contamination |      |
|-----|---------------------|------|
|     | HPI                 | HEI  |
| A1  | 29.5                | 3.45 |
| A2  | 27.8                | 3.36 |
| A3  | 34.3                | 5.65 |
| A4  | 29.0                | 3.44 |
| A5  | 37.9                | 9.13 |
| A6  | 188                 | 383  |
| A7  | 35.1                | 14.1 |
| A8  | 113                 | 35.6 |
| A9  | 120                 | 11.2 |
| A10 | 98.5                | 4.26 |
| A11 | 118                 | 11.3 |
| A12 | 115                 | 10.5 |
| A13 | 94.4                | 3.86 |
| A14 | 22.8                | 3.39 |
| A15 | 28.0                | 3.52 |
| A16 | 47.2                | 5.63 |
| A17 | 28.6                | 3.46 |
| A18 | 23.4                | 3.91 |
| A19 | 26.0                | 7.16 |
| A20 | 58.3                | 6.10 |
| A21 | 96.7                | 8.49 |
| A22 | 88.2                | 7.78 |
| A23 | 69.8                | 6.91 |

**Table S6.** Pollution and metal contamination assessing based on the indices values.

| <i>C<sub>f</sub></i> values |              |  | PLI values |                    | PERI values |                              |
|-----------------------------|--------------|--|------------|--------------------|-------------|------------------------------|
| < 8                         | Low          |  | > 1        | Pollution exists   | < 150       | Low ecological risk          |
| 8 - 16                      | Moderate     |  | < 1        | No metal pollution | 150 - 300   | Moderate ecological risk     |
| 16 - 32                     | Considerable |  |            |                    | 300 - 600   | Considerable ecological risk |
| < 32                        | Very high    |  |            |                    | < 600       | Very high ecological risk    |

**Table S7.** Comprehensive pollution indices of the analyzed metals in soil and sediment samples.

|     | Soil contamination   |            |             |       | Sediment contamination |            |             |
|-----|----------------------|------------|-------------|-------|------------------------|------------|-------------|
|     | <i>C<sub>f</sub></i> | <i>PLI</i> | <i>PERI</i> |       | <i>C<sub>f</sub></i>   | <i>PLI</i> | <i>PERI</i> |
| S1  | 5.88                 | 0.320      | 21.8        | Sed1  | 7.12                   | 0.239      | 123         |
| S2  | 9.93                 | 0.692      | 35.3        | Sed2  | 15.24                  | 0.569      | 187         |
| S3  | 9.57                 | 0.604      | 32.5        | Sed3  | 10.68                  | 0.554      | 141         |
| S5  | 42.8                 | 1.58       | 204         | Sed5  | 57.5                   | 1.95       | 929         |
| S7  | 11.1                 | 0.714      | 36.2        | Sed7  | 8.91                   | 0.505      | 83.4        |
| S8  | 35.9                 | 0.781      | 166         | Sed8  | 14.68                  | 0.741      | 195         |
| S9  | 12.2                 | 0.784      | 42.3        | Sed9  | 12.50                  | 0.605      | 109         |
| S13 | 12.7                 | 0.791      | 43.6        | Sed13 | 11.9                   | 0.621      | 96.9        |
| S14 | 20.2                 | 0.828      | 79.2        | Sed14 | 16.38                  | 0.938      | 119         |
| S16 | 10.6                 | 0.676      | 31.2        | Sed16 | 11.0                   | 0.525      | 85.6        |
| S17 | 9.05                 | 0.608      | 25.6        | Sed17 | 10.34                  | 0.476      | 90.7        |
| S18 | 13.6                 | 0.772      | 48.4        | Sed18 | 11.4                   | 0.514      | 101         |
| S20 | 17.7                 | 0.886      | 70.0        | Sed20 | 19.8                   | 0.985      | 152         |
| S21 | 23.6                 | 0.990      | 86.9        | Sed21 | 33.7                   | 0.966      | 565         |
| S22 | 10.7                 | 0.746      | 46.8        | Sed22 | 13.7                   | 0.488      | 259         |
| S23 | 8.75                 | 0.615      | 33.4        | Sed23 | 19.2                   | 0.464      | 385         |
